# Supplementary material for: Detection of glutathione with an “off–on” fluorescent biosensor based on N-acetyl-l-cysteine capped CdTe quantum dots
Source: Royal Society of Chemistry journal article supplement (doi:10.1039/c5an01365h), 2015-01-01
Supplement: c5an01365h1.pdf [file c5an01365h1.pdf]

## Detection of glutathione utilizing a “off-on” fluorescent biosensor based on N-acetyl-L-cysteine capped CdTe QDs

Xuanping Tan <sup>a</sup>, Jidong Yang<sup>\*a b c</sup>, Qin Li <sup>d</sup>, Qiong Yang <sup>c</sup>,

<sup>a</sup> School of Chemistry and Chemical Engineering, Southwest University, Chongqing, 400715, China; <sup>b</sup> School of Chemistry and Environmental Engineering, Chongqing Three Gorges University, Wanzhou, Chongqing 404000, China; <sup>c</sup> School of Chemistry and Chemical Engineering, Yangtze Normal University, Chongqing, Fuling 408100, China; <sup>d</sup> Chongqing Medical and Health school, Fuling, Chongqing 408100, P. R. China;

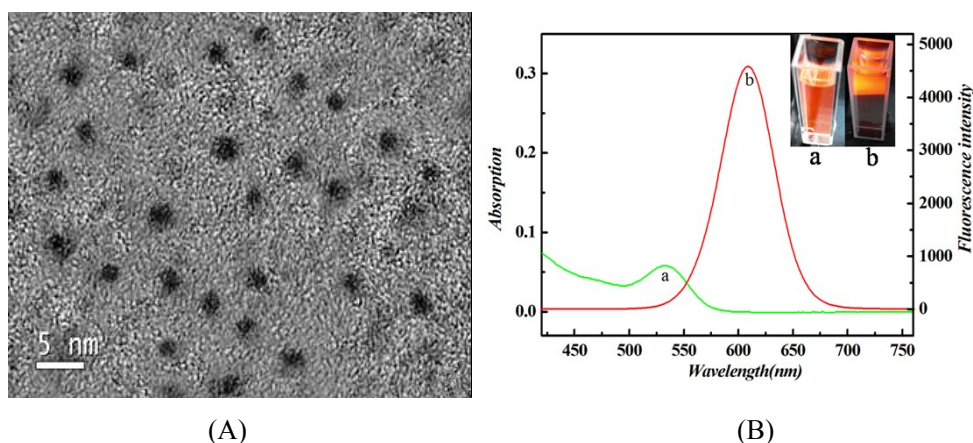

Fig.S1 (A) TEM image; (B) UV-vis absorption (curve a) and fluorescence (curve b) spectra of as-prepared NALC-capped CdTe QDs.

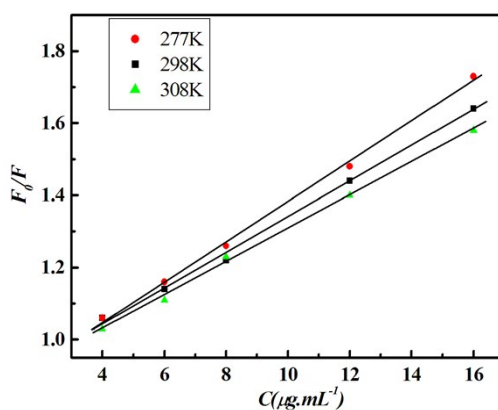

Fig.S2 Stern-Volmer curves for the NALC-CdTe QDs-Hg<sup>2+</sup> solution system at three different temperatures (NALC-capped CdTe QDs,  $1.425 \times 10^{-4}$  mol·L<sup>-1</sup>; Tris-HCl buffer solution, 0.5 mL, pH=7.4)

---

\*Corresponding author at: School of Chemistry and Chemical Engineering,  
Southwest University, Chongqing, Beibei 400715, China. Tel.: +86 18996678896.  
E-mail address: flyjd6400@163.com (J. Yang).

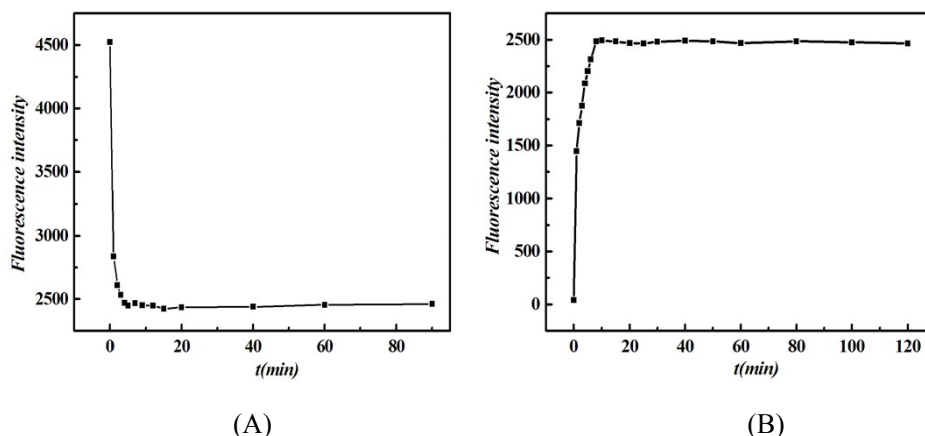

**Fig S3** The effect of time on the NALC-capped CdTe QDs-Hg<sup>2+</sup> system (A) and NALC-capped CdTe QDs-Hg<sup>2+</sup>-GSH system (B). (NALC-capped CdTe QDs,  $1.425 \times 10^{-4}$  mol·L<sup>-1</sup>; Tris-HCl buffer solution, 0.5 mL, pH=7.4)

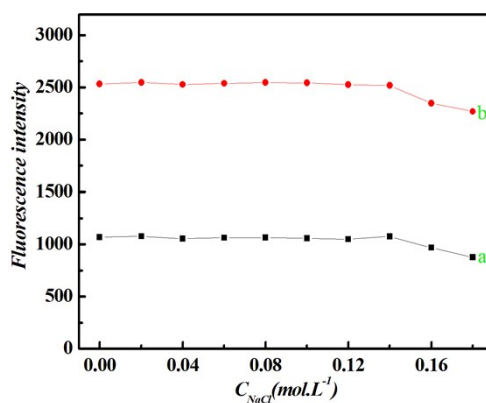

**Fig S4** The effect of ionic strength on the NALC-capped CdTe QDs-Hg<sup>2+</sup> system (curve a) and NALC-capped CdTe QDs-Hg<sup>2+</sup>-GSH system (curve b). (NALC-capped CdTe QDs:  $1.425 \times 10^{-4}$  mol·L<sup>-1</sup>; HgCl<sub>2</sub>: 24 μg·mL<sup>-1</sup>; GSH: 64 μg·mL<sup>-1</sup>; 0.5 mL Tris-HCl buffer solution (7.4)).
